# Supplementary material for: Histone Deacetylase 3 Governs β-Estradiol-ERα-Involved Endometrial Tumorigenesis via Inhibition of STING Transcription
Source: MDPI journal article supplement (doi:10.3390/cancers14194718), 2022-09-28
Supplement: s1 [file s1]

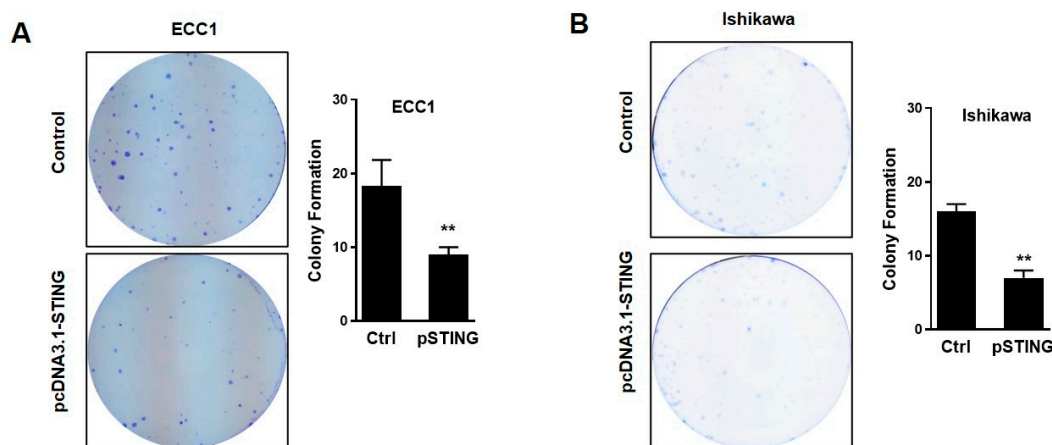

**Figure S1.** A-B) Colony formation assays of ECC1 (A) and Ishikawa cells (B) transfected with pcDNA3.1-STING construct.

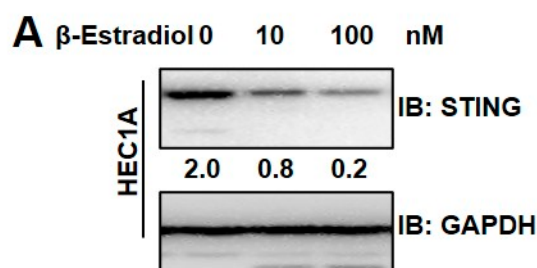

**Figure S2.** A) IB analysis of WCL derived from HEC1A cells.

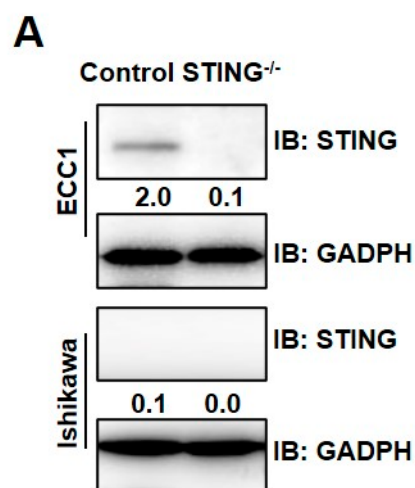

**Figure S3.** (A) IB analysis of WCL derived from ECC1 and Ishikawa STING<sup>-/-</sup> cells.

**Table S1.** qPCR primers.

| Primer name   | sequences                     |
|---------------|-------------------------------|
| Sting F       | 5'-CCAGAGCACACTCTCCGGTA-3'    |
| Sting R       | 5'-CGCATTGGGAGGGAGTAGTA-3'    |
| cGAS F        | 5'-CACGAAGCCAAGACCTCCG-3'     |
| cGAS R        | 5'-GTCGCACTTCAGTCTGAGCA-3'    |
| IFN $\beta$ F | 5'-ATGACCAACAAGTGTCTCCTCC-3'  |
| IFN $\beta$ R | 5'-GGAATCCAAGCAAGTTGTAGCTC-3' |

|          |                               |
|----------|-------------------------------|
| cd5 F    | 5'-CCAAGCAGTCGTCTTTGTCAC-3'   |
| cd5 R    | 5'-CTCTGGGTTGGCACACACTT-3'    |
| CXCL10 F | 5'-GTGGCATTCAAGGAGTACCTC-3'   |
| CXCL10 R | 5'-TGATGGCCTTCGATTCTGGATT-3'  |
| HDAC1 F  | 5'-CTACTACGACGGGGATGTTGG-3'   |
| HDAC1 R  | 5'-GAGTCATGCGGATTCGGTGAG-3'   |
| HDAC3 F  | 5'-CCTGGCATTGACCCATAGCC-3'    |
| HDAC3 R  | 5'-CTCTTGGTGAAGCCTTGCATA-3'   |
| HDAC2 F  | 5'-ATGGCGTACAGTCAAGGAGG-3'    |
| HDAC2 R  | 5'-TGCGGATTCTATGAGGCTTCA-3'   |
| HDAC8 F  | 5'-TCGCTGGTCCCGGTTTATATC-3'   |
| HDAC8 R  | 5'-TACTGGCCCCGTTTGGGGAT-3'    |
| GADPH F  | 5'-GGAGCGAGATCCCTCCAAAAT-3'   |
| GADPH R  | 5'-GGCTGTTGTCATACTTCTCATGG-3' |

---
